# Supplementary material for: Cryo-electron microscopy structure of the 70S ribosome from Enterococcus faecalis
Source: Sci Rep. 2020 Oct 1;10:16301. doi: 10.1038/s41598-020-73199-6 (PMC7530986; doi:10.1038/s41598-020-73199-6)
Supplement: Supplementary file 1 — Supplementary Information. [file 41598_2020_73199_MOESM1_ESM.pdf]

## SUPPLEMENTARY INFORMATION

### **Cryo-Electron Microscopy Structure of the 70S Ribosome from *Enterococcus faecalis***

Eileen L. Murphy<sup>1</sup>, Kavindra V. Singh<sup>2,3</sup>, Bryant Avila<sup>4</sup>, Torsten Kleffmann<sup>5</sup>, Steven T. Gregory<sup>6</sup>, Barbara E. Murray<sup>2,3,7</sup>, Kurt L. Krause<sup>5\*</sup>, Reza Khayat<sup>4\*</sup>, and Gerwald Jogl<sup>1\*</sup>

<sup>1</sup>Department of Molecular Biology, Cell Biology, and Biochemistry, Brown University, Providence, RI 02912, USA

<sup>2</sup>Division of Infectious Diseases, Department of Internal Medicine, University of Texas Health Science Center, Houston, TX, 77030, USA

<sup>3</sup>Center for Antimicrobial Resistance and Microbial Genomics, University of Texas Health Science Center, Houston, TX, 77030, USA

<sup>4</sup>Department of Chemistry and Biochemistry, The City College of New York, New York, NY, 10031, USA

<sup>5</sup>Department of Biochemistry, University of Otago, Dunedin, 9054, New Zealand

<sup>6</sup>Department of Cell and Molecular Biology, The University of Rhode Island, Kingston, RI, 02881, USA

<sup>7</sup>Department of Microbiology and Molecular Genetics, University of Texas Health Science Center, Houston, TX, 77030, USA

## Supplementary Methods

### Mass spectrometry-based proteomics of purified ribosomes

Sample preparation: Purified ribosomes containing 200 µg of protein were solubilized and denatured by sonication and heating to 45 °C in a buffer containing 0.1 % SDS, 5 mM tris(2-carboxyethyl)phosphine (TCEP), 5 mM EDTA/EGTA in 40 mM Tris-base (pH~10.5, no pH adjustment). The sample was then incubated with Benzonase®, for 10 min and centrifuged for 30 min at 16,000 g. The supernatant was subjected to filter-aided sample preparation (FASP) using 0.5 ml Amicon (Ultracel-3K) ultrafiltration units, essentially following the protocol by Wiśniewski et al<sup>1</sup>. The protein sample was digested on filter with 5 µg of trypsin at 37 °C for 12 hours and then supplemented with additional 5 µg of trypsin and digested for another 5 hours.

After digestion the peptides were purified by solid phase extraction (SPE) on a C18 Sep Pak cartridge (Waters) and fractionated into 12 fractions by in solution isoelectric focusing using a 3000 OFF-GEL-Fractionator (Agilent) following the manufacturer's instructions.

Liquid chromatography-coupled tandem mass spectrometry (LC-MS/MS): Five µl sample were loaded onto an Ultimate 3000 nanoflow uHPLC system inline coupled to a nanospray ionization source of a LTQ-Orbitrap XL mass spectrometer (Thermo Scientific). Each fraction was analysed twice by two different methods using a 90 min and 120 min LC-gradient from 5 to 45% acetonitrile. Precursor ion spectra were acquired in the Orbitrap analyser in a mass range of m/z 400 to 2000 at a resolution of 60000. The strongest 11 (short method) or 14 (long method) precursor ions per cycle were selected for collision induced dissociation MS in the ion trap analyzer. For both methods dynamic exclusion was enabled allowing for two repeat measurements within a period of 90 seconds.

Data analysis: Raw data were analysed using the ProteomeDiscoverer software version 2.3 (Thermo Scientific). Peak lists were generated using default settings. All fractions were combined and searched against an *E. faecalis* (ATCC 29212 and V583 strains) amino acid sequence database (downloaded from NCBI on 14-06-2018; 15,617 sequence entries) using the Sequest HT program. Oxidation (methionine), deamidation (asparagine, glutamine), acetylation (lysine) and mono-, di- & trimethylation (lysine) were selected as variable and carbamido-methylation (cysteine) as static amino acid side chain modifications. The Percolator node was used for the estimation of false discovery rates. Only high confidence protein identifications at a false discovery rate of less than 1% were accepted as significant identifications. We allowed for proteins that were identified with one or more significant peptide identification, because several ribosomal proteins are of low molecular weight resulting in a low number of observable tryptic fragments. However, we set a conservative score (XCorr) threshold of 3 for single peptide hits and manually assessed the peak assignment in the spectra of these peptide hits. Identified proteins are listed in Supplementary Table S1.

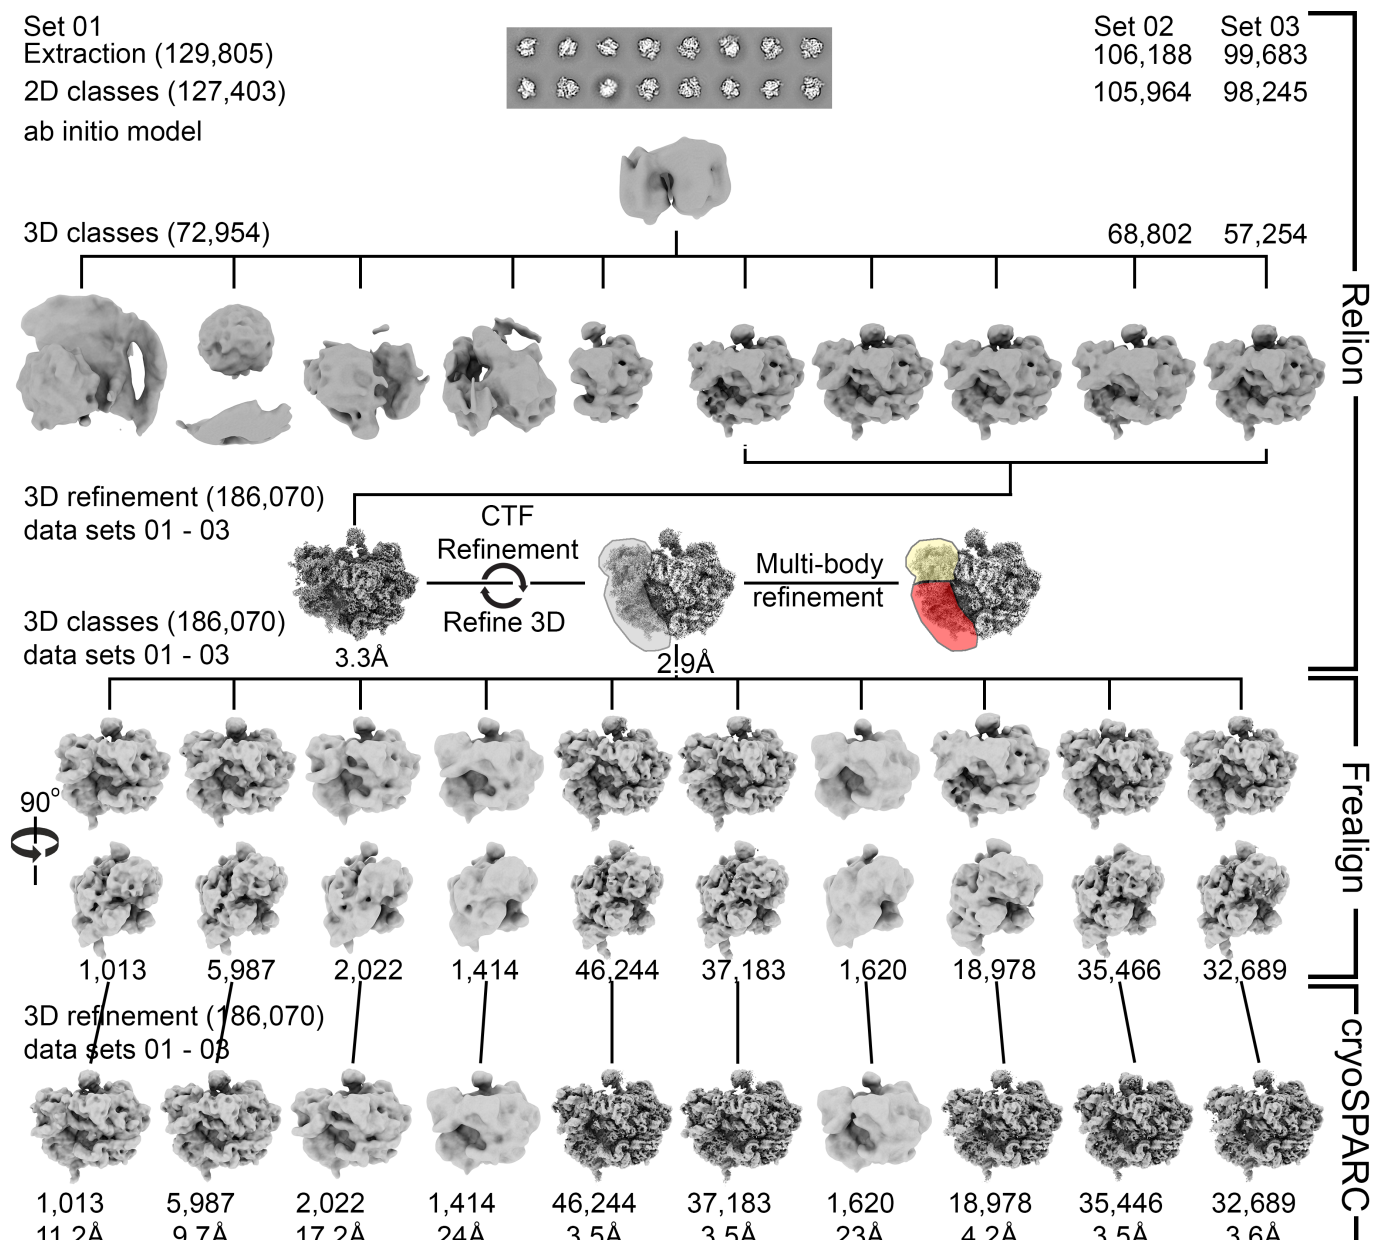

**Supplementary Figure S1.** Data processing overview.

Flowchart of workflow used to process cryo-EM particles extracted from dose weighted micrographs collected in three data sets (Set 01, 02, and 03). The numbers next to the processing step indicate the number of particles remaining after the executed process (e.g. 129,805 particles remained after extraction for Set 01). The best particles from the three data sets were combined to generate a single 70S cryo-EM map. The grey, red and yellow contour outlines represent the 50S, the 30S body and 30S head masks used for focused classification, and multi-body refinement. All 3D classes were refined to the highest possible resolution.

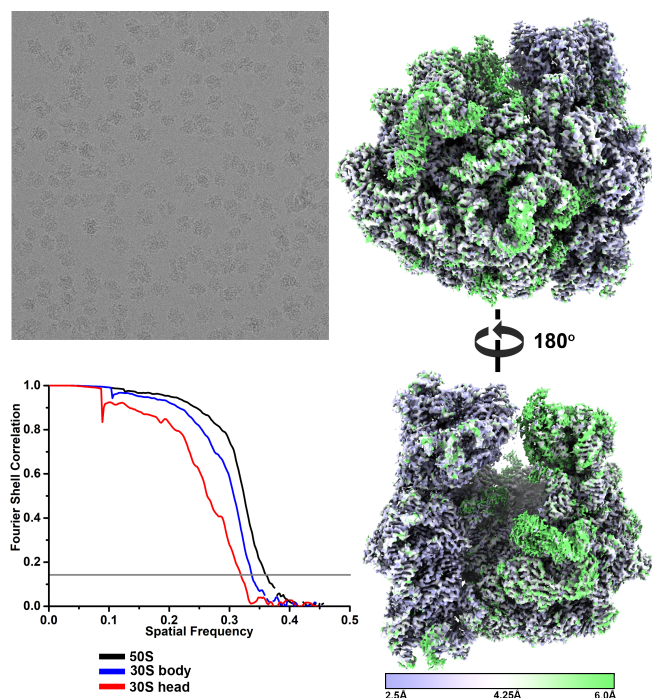

**Supplementary Figure S2.** Cryo-EM data collection and processing.

(a) Representative electron micrograph of *E. faecalis* 70S ribosomes. (b) Fourier Shell Correlation (FSC) curve shown for the 70S multi-body refinement. (c) Cryo-EM molecular envelope and (d) rotated by 180° coloured according to local resolution as shown.

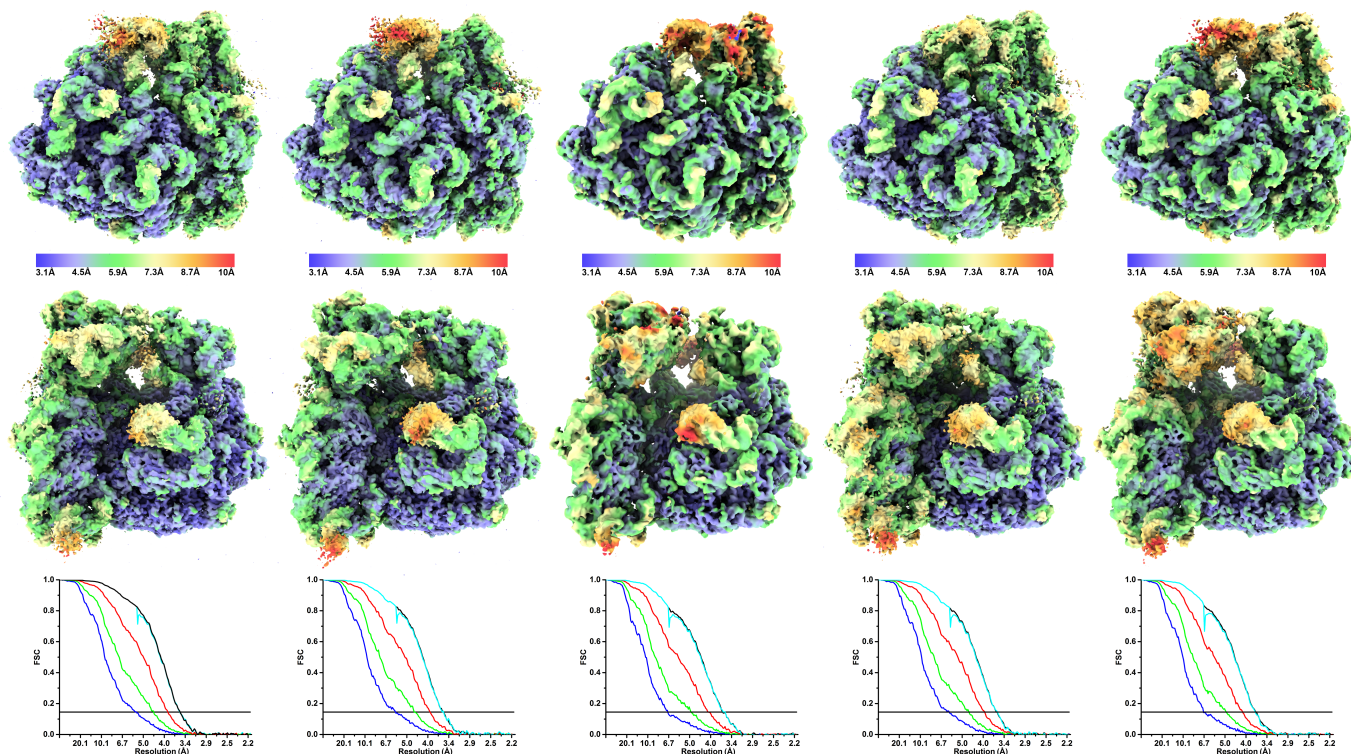

**Supplementary Figure S3.** Data quality for classes 1 to 5.

(a) Local resolution of image reconstructions for conformations 1 to 5. (b) Fourier Shell Correlation Curves for 70S classes 1 to 5. The coloured plots are no mask (blue), spherical (green), loose (red), tight (cyan), and corrected (black).

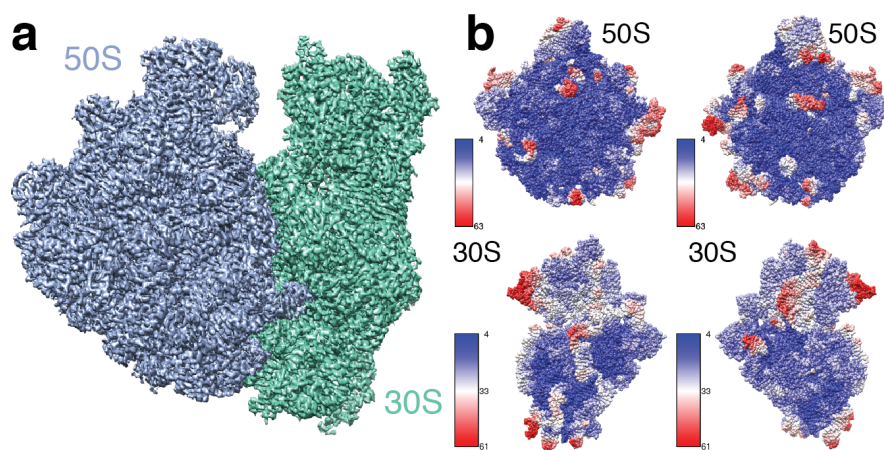

**Supplementary Figure S4.** Refinement.

(a) Combined multi-body refined cryo-EM map for the 70S ribosome. (b) B factor plots for (top) the 50S subunit and (bottom) the 30S subunit in two orientations, 180° apart.

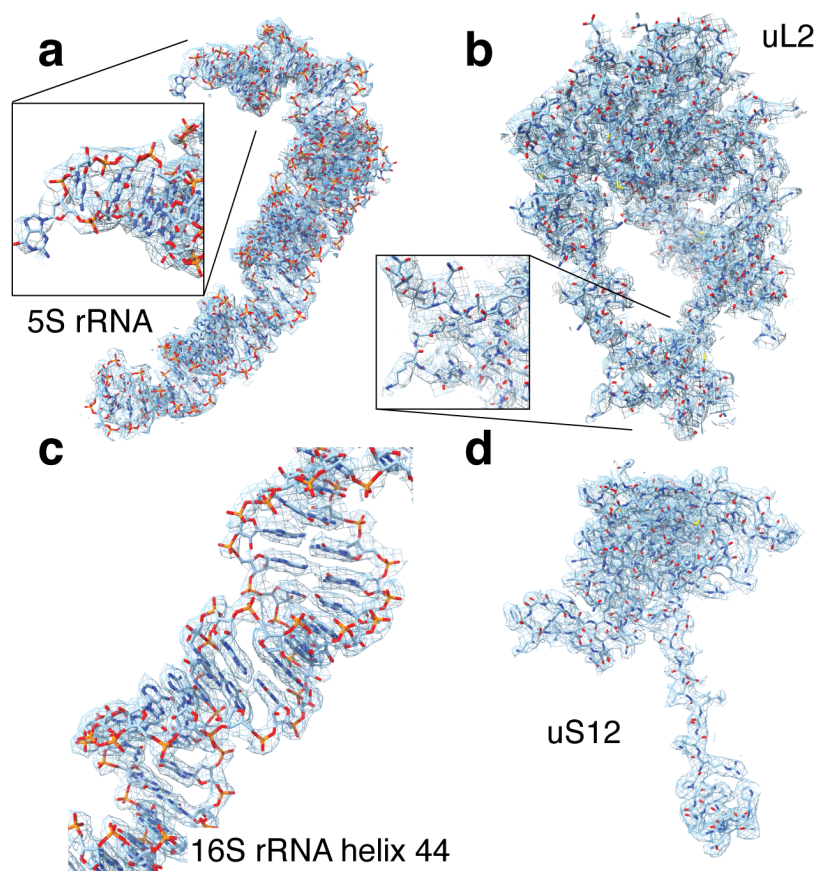

**Supplementary Figure S5.** Cryo-EM maps.

Cryo-EM maps for 5S rRNA (a) and ribosomal protein uL2 (b) in the 50S subunit and a section of 16S rRNA helix 44 (c) and ribosomal protein uS12 (d) are shown to illustrate the quality of the maps.

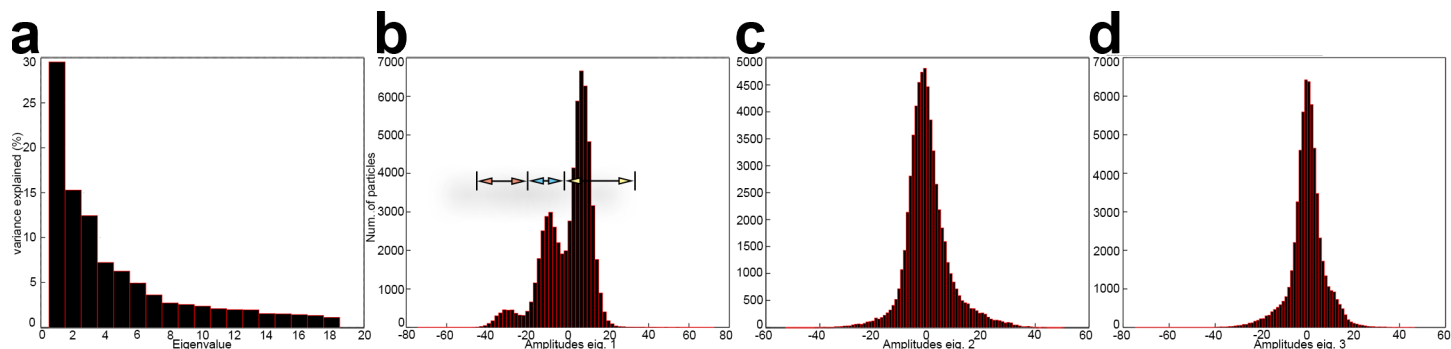

### Supplementary Figure S6. Multi-body refinement

(a) Histogram of eigenvector contribution to the variance within the data. The first three eigenvectors describe 56% of the data. The first seven eigenvectors describe 75% of the data. (b) Histogram of amplitudes along eigenvector 1 shows a trimodal distributions. Particles were split into three sets to generate three classes with Relion: those with amplitudes smaller than -20 (red arrow), those with amplitudes between -20 and 0 (cyan arrow), and those with amplitudes greater than 0 (yellow arrow). (c) Histogram of amplitudes along eigenvector 2 indicating continuous motion. (d) Histogram of amplitudes along eigenvector 3 indicating continuous motion.

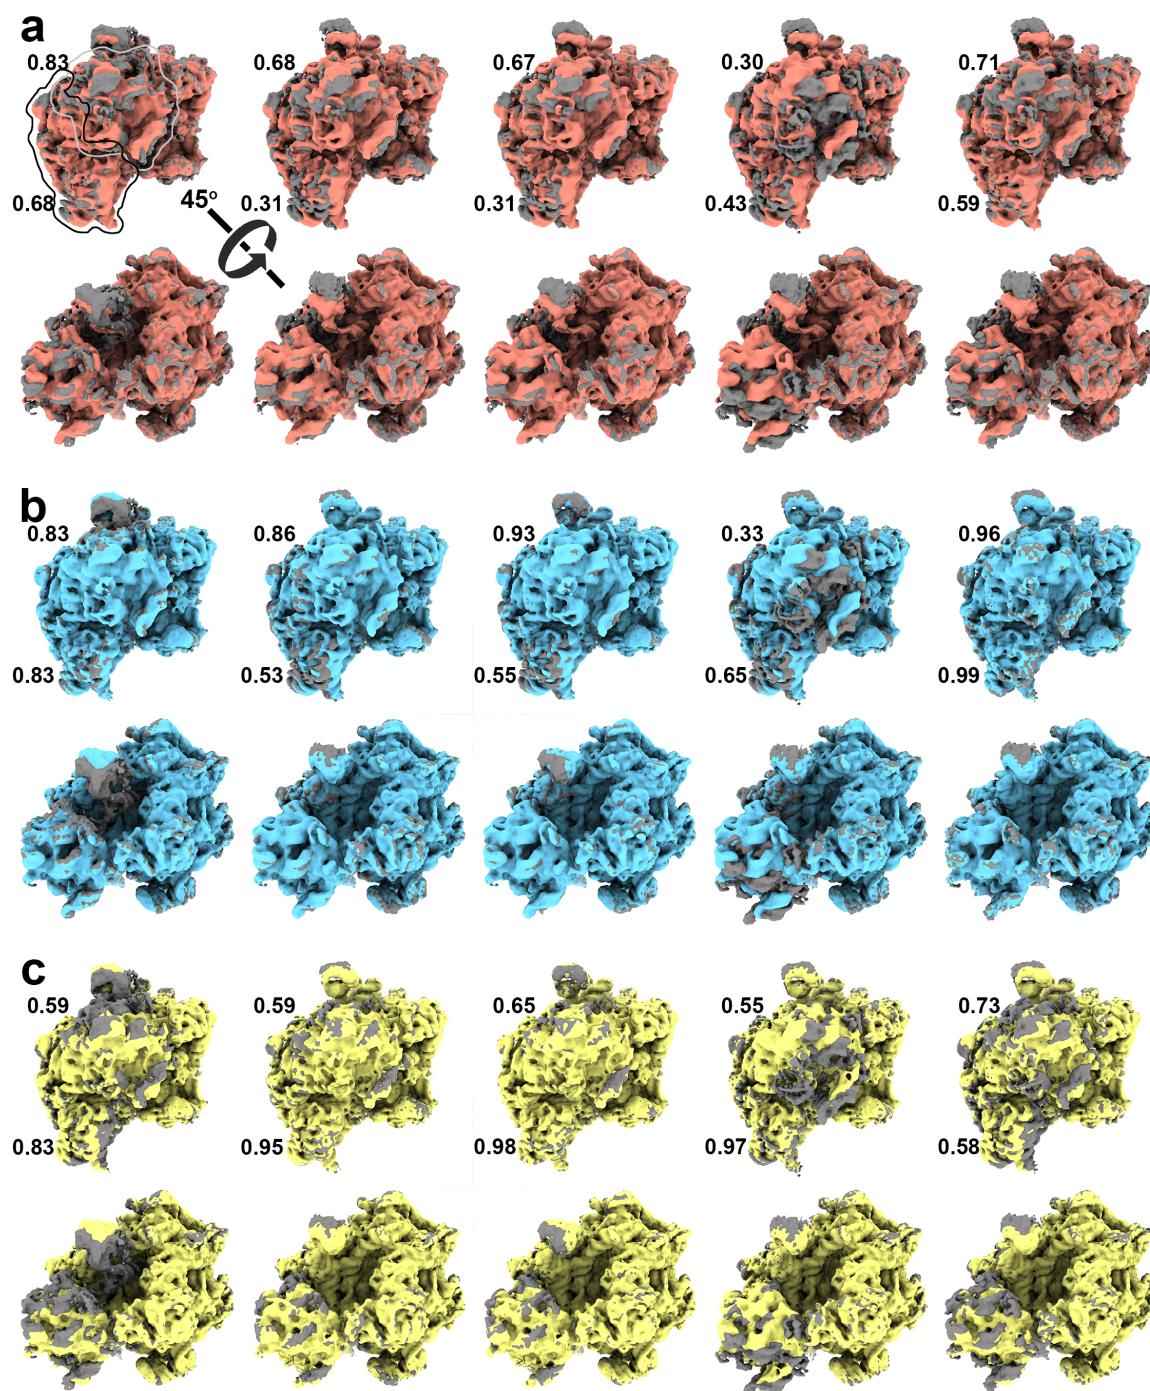

### Supplementary Figure S7. Comparison of classes from multi-body and focused classification

Classes attained using multi-body refinement are compared to classes 1-5 (left to right) attained using focused classification. The multi-body classes correspond to the three peaks in the eigenvector 1 plot shown in the same colouring in Figure S6. Two orientations are shown to highlight the differences between the classes. The arrow indicates the rotation between the top and bottom images. The numbers indicate the normalized correlation coefficient for the 30S body and 30S head after the two maps were aligned according to their 50S density. The grey and black outlines in the top left image identify the 30S head and body respectively. (a) Multi-body analysis class attained from particles with amplitudes smaller than -20 in eigenvector 1 (red) compared to classes 1-5 from focused classification (grey). (b) Multi-body analysis class attained from particles with amplitudes between -20 and 0 in eigenvector 1 (blue) compared to classes 1-5 from focused classification (grey). (c) Multi-body analysis class attained from particles with amplitudes larger than 0 in eigenvector 1 (yellow) compared to classes 1-5 from focused classification (grey).

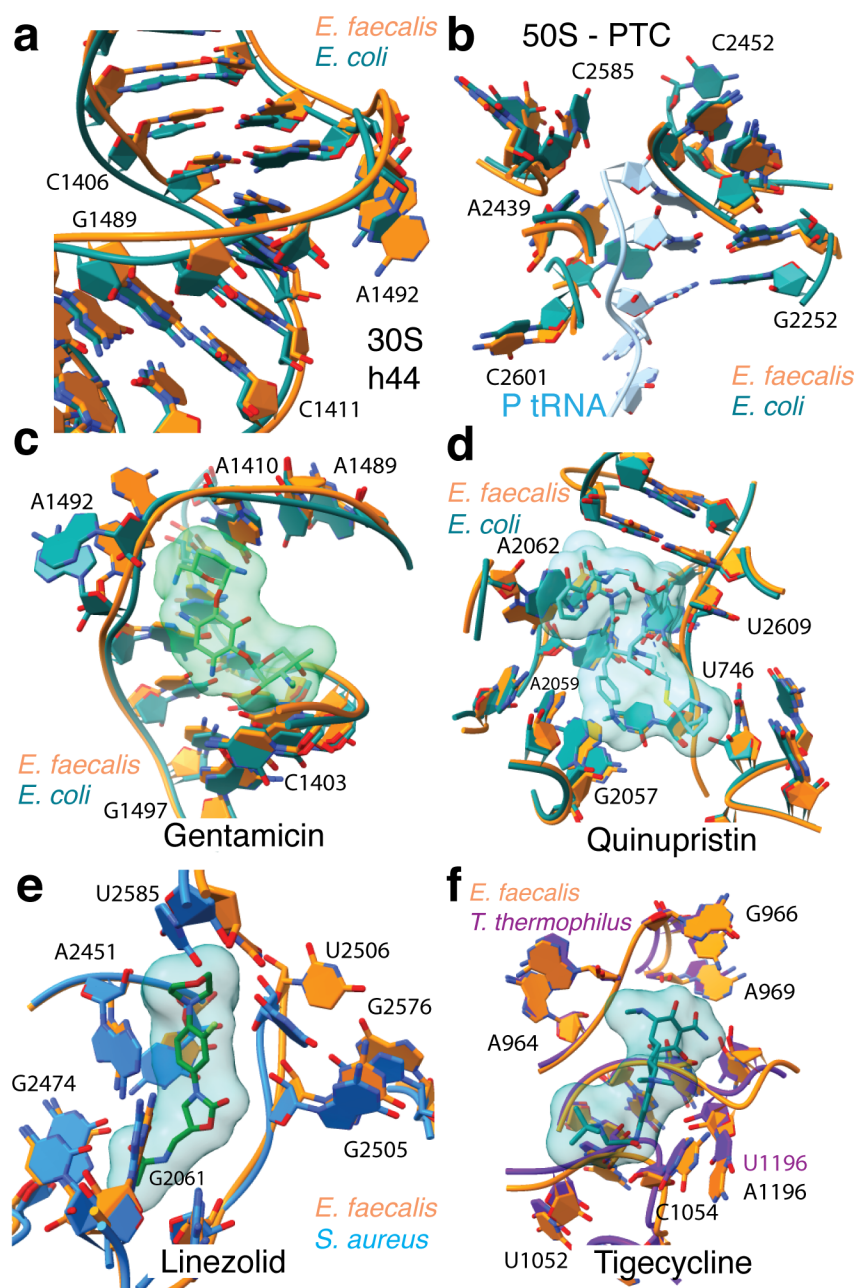

**Supplementary Figure S8.** Structural conservation between *E. faecalis* and *E. coli*

(a) Superposition of the 30S decoding centre comparing *E. faecalis* (orange) with *E. coli* (teal). (b) Superposition of the peptidyl-transferase centre comparing *E. faecalis* with *E. coli*. P-site tRNA (cyan) is shown for reference. (c) Comparison of the gentamicin binding site in *E. faecalis* with *E. coli* (teal, PDB 4V53<sup>2</sup>). (d) Comparison of the quinupristin binding site between *E. faecalis* and *E. coli* (teal, PDB 4U26<sup>3</sup>). (e) Comparison of the linezolid binding site in *E. faecalis* with *S. aureus* (blue, PDB 4WFA<sup>4</sup>). (f) Comparison of the tigecycline binding site in *E. faecalis* with *T. thermophilus* (purple, PDB 4V9B<sup>5</sup>)

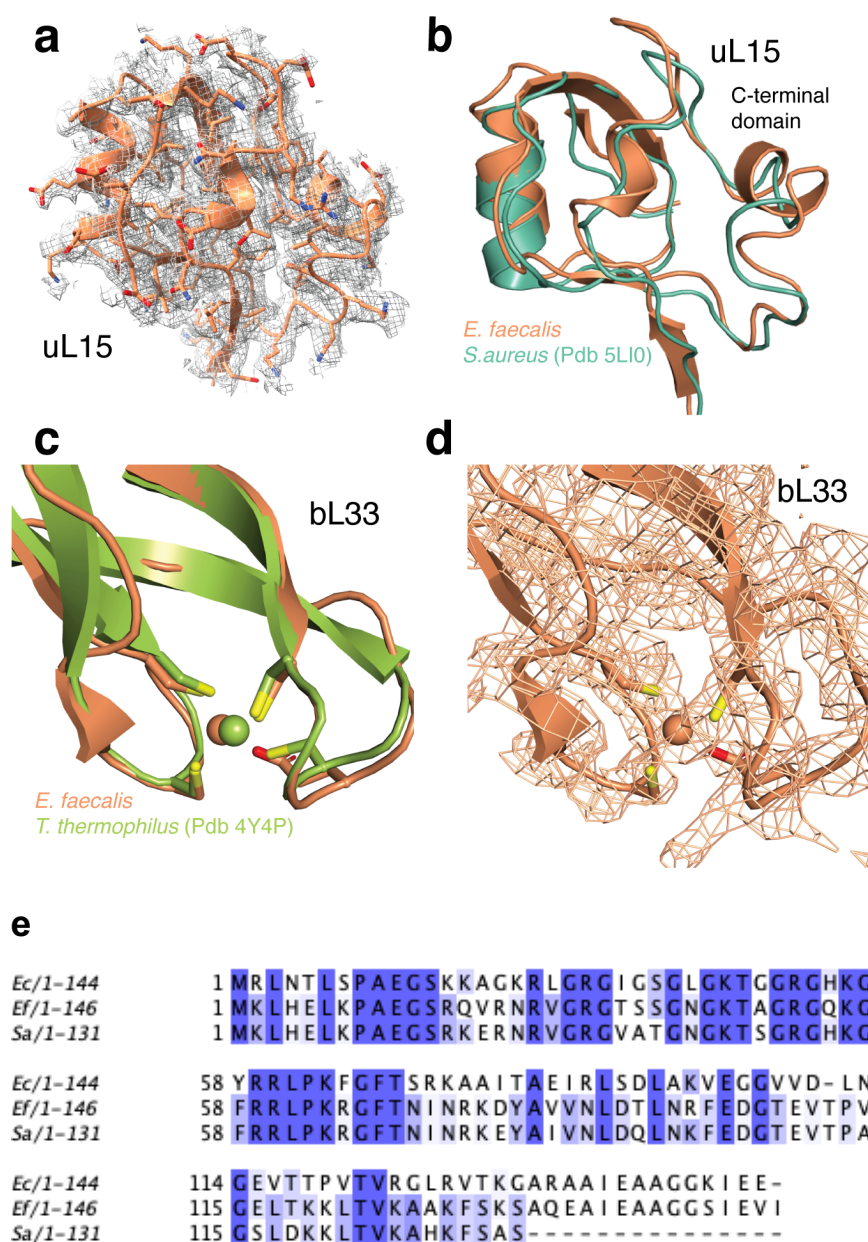

**Supplementary Figure S9.** Structural differences between *E. faecalis*, *S. aureus* and *T. thermophilus*. (a) Cryo-EM map for protein uL15, (b) Superposition of uL15 from *E. faecalis* and *S. aureus* (c) Superposition of bL33 from *E. faecalis* and *T. thermophilus*. (d) Cryo-EM map for ribosomal protein bL33 in class 5 (4.0  $\sigma$  contour). (e) Sequence alignment for ribosomal protein L15.

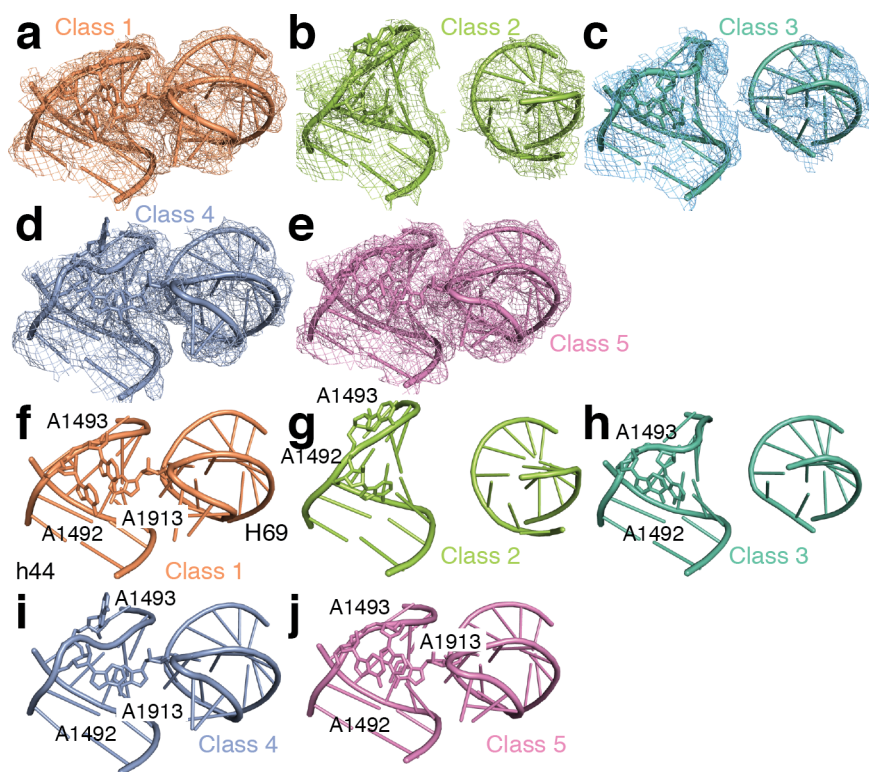

**Supplementary Figure S10. Helix 69 conformation**

(a-e) Cryo-EM maps (3.5  $\sigma$  contour) for the bridge B2a contacts between 16S helix 44 (left) and 23S helix 69 (right) in classes 1 to 5, respectively. (f-j) cartoon representation of modelled nucleotides in each of the five classes.

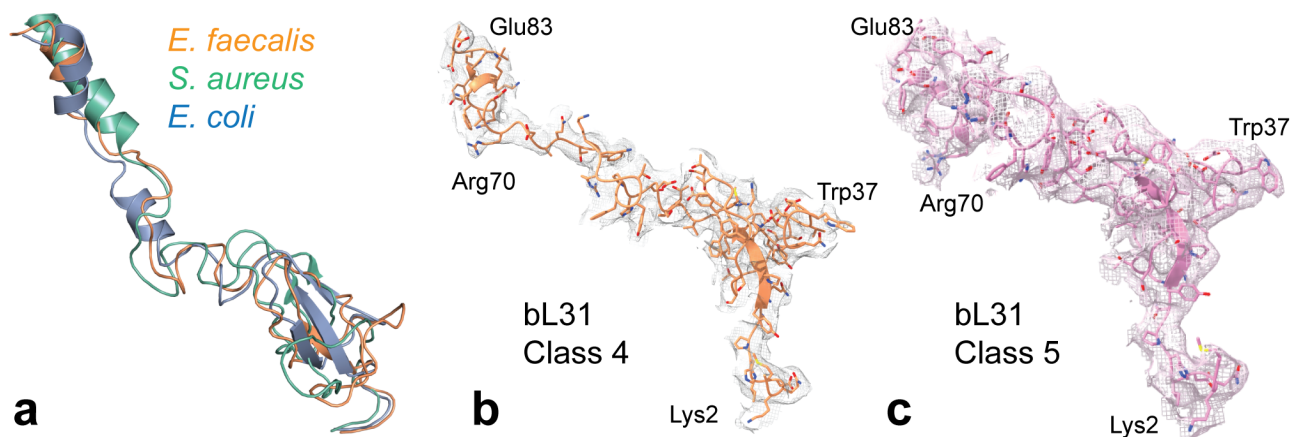

**Supplementary Figure S11. Ribosomal protein bL31**

(a) Superposition of ribosomal protein bL31 in *E. faecalis* (orange), *S. aureus* (green), and *E. coli* (blue). (b) Cryo-EM map for ribosomal protein bL31 in class 4 and (c) in class 5. The rmsd for C $\alpha$  atoms is 8.6 Å between *E. faecalis* and *S. aureus*, and 7.6 Å between *E. faecalis* with *E. coli*.

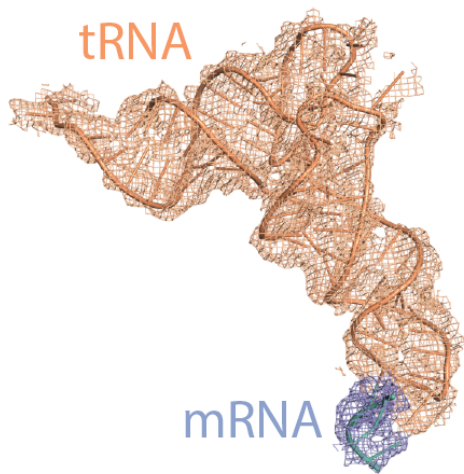

**Supplementary Figure S12.**

Cryo-EM map for tRNA (orange) and mRNA (blue) in class 1 (3.5  $\sigma$  contour).

**Supplementary Movies S1 – S3.**

Movies visualize the rigid-body movement described by Relion's Multi-Body refinement (50S, 30S body, and 30S head). Supplementary Movie 1 visualizes the movements described by eigenvector 1. Supplementary Movie 2 visualizes the movements described by eigenvector 2, and Supplementary Movie 3 describes the movements described by eigenvector 3.

**Table S1.** Mass-spectrometry results. List of highest scoring proteins of purified *E. faecalis* ribosomes identified by mass spectrometry.

| Accession<br>(gi number) | Protein description                                                        | Area under<br>the curve* | emPAI**  | Number of<br>peptide<br>spectrum<br>matches<br>(PSM) | Number of<br>identified<br>peptides*** | Number of<br>unique<br>peptides |
|--------------------------|----------------------------------------------------------------------------|--------------------------|----------|------------------------------------------------------|----------------------------------------|---------------------------------|
| 29342321                 | ribosomal protein L5<br>[Enterococcus faecalis<br>V583]                    | 1.70E+10                 | 17011.54 | 1720                                                 | 15                                     | 15                              |
| 73621756                 | RecName: Full=50S<br>ribosomal protein L31 type<br>B                       | 1.30E+10                 | 9999.00  | 415                                                  | 4                                      | 4                               |
| 29342303                 | ribosomal protein S7<br>[Enterococcus faecalis<br>V583]                    | 2.80E+10                 | 5622.41  | 852                                                  | 11                                     | 11                              |
| 73917096                 | RecName: Full=50S<br>ribosomal protein L29                                 | 2.10E+09                 | 2153.44  | 296                                                  | 3                                      | 3                               |
| 1145682716               | 30S ribosomal protein S6<br>[Enterococcus faecalis<br>ATCC 29212]          | 1.80E+10                 | 1777.28  | 545                                                  | 6                                      | 6                               |
| 401674297                | LSU ribosomal protein<br>L30p (L7e) [Enterococcus<br>faecalis ATCC 29212]  | 2.90E+09                 | 1777.28  | 324                                                  | 2                                      | 2                               |
| 401672703                | SSU ribosomal protein<br>S18p [Enterococcus<br>faecalis ATCC 29212]        | 2.80E+09                 | 1583.89  | 203                                                  | 4                                      | 4                               |
| 508211353                | 30S ribosomal protein S2<br>[Enterococcus faecalis<br>V583]                | 2.90E+10                 | 1332.52  | 1212                                                 | 15                                     | 15                              |
| 1145686616               | 50S ribosomal protein L6<br>[Enterococcus faecalis<br>ATCC 29212]          | 1.80E+10                 | 1210.53  | 1774                                                 | 12                                     | 12                              |
| 1145683984               | 50S ribosomal protein L20<br>[Enterococcus faecalis<br>ATCC 29212]         | 1.10E+10                 | 748.89   | 633                                                  | 5                                      | 2                               |
| 508176379                | 50S ribosomal protein L16<br>[Enterococcus faecalis<br>V583]               | 7.10E+09                 | 629.96   | 374                                                  | 4                                      | 4                               |
| 401674290                | SSU ribosomal protein<br>S11p (S14e) [Enterococcus<br>faecalis ATCC 29212] | 4.30E+09                 | 516.95   | 288                                                  | 7                                      | 7                               |
| 29342312                 | ribosomal protein L2<br>[Enterococcus faecalis<br>V583]                    | 1.40E+10                 | 407.42   | 1017                                                 | 13                                     | 13                              |
| 29377195                 | 50S ribosomal protein L10<br>[Enterococcus faecalis<br>V583]               | 1.40E+10                 | 315.23   | 630                                                  | 12                                     | 12                              |
| 508175177                | 30S ribosomal protein S20<br>[Enterococcus faecalis<br>V583]               | 1.20E+10                 | 250.19   | 248                                                  | 4                                      | 4                               |
| 39931893                 | RecName: Full=50S<br>ribosomal protein L19                                 | 5.70E+09                 | 236.14   | 444                                                  | 7                                      | 7                               |
| 674290627                | ribosomal protein S5<br>[Enterococcus faecalis<br>ATCC 29212]              | 1.40E+10                 | 192.07   | 755                                                  | 12                                     | 12                              |
| 674289263                | 30S ribosomal protein S13<br>[Enterococcus faecalis<br>ATCC 29212]         | 1.70E+10                 | 192.07   | 434                                                  | 7                                      | 7                               |
| 41017833                 | RecName: Full=30S<br>ribosomal protein S4                                  | 6.50E+09                 | 162.79   | 455                                                  | 12                                     | 12                              |
| 508215680                | 50S ribosomal protein L4<br>[Enterococcus faecalis<br>V583]                | 2.10E+10                 | 157.49   | 1192                                                 | 8                                      | 8                               |
| 29342308                 | ribosomal protein S10<br>[Enterococcus faecalis<br>V583]                   | 1.80E+10                 | 132.35   | 326                                                  | 9                                      | 9                               |
| 1145687473               | 50S ribosomal protein L11<br>[Enterococcus faecalis<br>ATCC 29212]         | 1.20E+10                 | 122.29   | 428                                                  | 6                                      | 6                               |

|            |                                                                            |          |       |      |    |    |
|------------|----------------------------------------------------------------------------|----------|-------|------|----|----|
| 508176367  | 50S ribosomal protein L15<br>[Enterococcus faecalis<br>V583]               | 2.80E+10 | 99.00 | 687  | 8  | 8  |
| 508215702  | 50S ribosomal protein L36<br>[Enterococcus faecalis<br>V583]               | 2.00E+09 | 99.00 | 127  | 1  | 1  |
| 508215402  | 50S ribosomal protein L13<br>[Enterococcus faecalis<br>V583]               | 1.90E+10 | 76.43 | 382  | 6  | 6  |
| 488285219  | MULTISPECIES: 50S<br>ribosomal protein L7/L12<br>[Bacilli]                 | 3.50E+07 | 67.13 | 391  | 6  | 1  |
| 674288509  | ribosomal protein S16<br>[Enterococcus faecalis<br>ATCC 29212]             | 1.80E+10 | 62.10 | 281  | 4  | 4  |
| 498521670  | MULTISPECIES: 50S<br>ribosomal protein L20<br>[Enterococcus]               | 4.40E+06 | 55.23 | 263  | 4  | 1  |
| 401673657  | LSU ribosomal protein L1p<br>(L10Ae) [Enterococcus<br>faecalis ATCC 29212] | 1.20E+10 | 45.42 | 1203 | 12 | 12 |
| 508215683  | 30S ribosomal protein S19<br>[Enterococcus faecalis<br>V583]               | 1.50E+09 | 45.42 | 95   | 4  | 4  |
| 29343014   | ribosomal protein L27<br>[Enterococcus faecalis<br>V583]                   | 2.30E+10 | 45.42 | 414  | 2  | 2  |
| 488284744  | MULTISPECIES: 50S<br>ribosomal protein L32<br>[Bacilli]                    | 3.10E+09 | 45.42 | 109  | 1  | 1  |
| 488285007  | MULTISPECIES: 30S<br>ribosomal protein S8<br>[Bacilli]                     | 7.00E+09 | 38.81 | 323  | 7  | 7  |
| 508169747  | 50S ribosomal protein L21<br>[Enterococcus faecalis<br>V583]               | 1.20E+10 | 36.28 | 654  | 5  | 5  |
| 42559615   | RecName: Full=50S<br>ribosomal protein L3                                  | 1.80E+10 | 33.55 | 900  | 8  | 8  |
| 488313134  | MULTISPECIES: 50S<br>ribosomal protein L7/L12<br>[Enterococcus]            | 4.40E+06 | 30.62 | 384  | 6  | 1  |
| 29374862   | 50S ribosomal protein L24<br>[Enterococcus faecalis<br>V583]               | 8.00E+09 | 30.62 | 255  | 4  | 4  |
| 508211776  | 50S ribosomal protein L33<br>3 [Enterococcus faecalis<br>V583]             | 4.10E+09 | 30.62 | 91   | 1  | 1  |
| 29342311   | ribosomal protein L23<br>[Enterococcus faecalis<br>V583]                   | 1.10E+10 | 26.83 | 566  | 7  | 7  |
| 488285020  | MULTISPECIES: 50S<br>ribosomal protein L17<br>[Bacilli]                    | 1.60E+10 | 24.12 | 495  | 6  | 6  |
| 1145686611 | 50S ribosomal protein L14<br>[Enterococcus faecalis<br>ATCC 29212]         | 6.00E+09 | 22.10 | 347  | 8  | 8  |
| 401674309  | SSU ribosomal protein S3p<br>(S3e) [Enterococcus<br>faecalis ATCC 29212]   | 1.80E+10 | 21.76 | 506  | 8  | 8  |
| 401673527  | SSU ribosomal protein S9p<br>(S16e) [Enterococcus<br>faecalis ATCC 29212]  | 1.50E+10 | 18.95 | 646  | 4  | 4  |
| 29374856   | 50S ribosomal protein L22<br>[Enterococcus faecalis<br>V583]               | 5.00E+09 | 18.31 | 233  | 5  | 5  |
| 727117415  | 50S ribosomal protein L25<br>[Enterococcus faecalis]                       | 1.70E+09 | 14.85 | 286  | 6  | 6  |
| 73621593   | RecName: Full=50S<br>ribosomal protein L18                                 | 4.50E+09 | 9.00  | 155  | 6  | 6  |
| 1145684626 | 30S ribosomal protein S15<br>[Enterococcus faecalis<br>ATCC 29212]         | 2.40E+08 | 9.00  | 34   | 3  | 3  |
| 1145687236 | 30S ribosomal protein S21<br>[Enterococcus faecalis<br>ATCC 29212]         | 2.20E+09 | 9.00  | 33   | 2  | 2  |

|            |                                                                                    |          |      |     |    |    |
|------------|------------------------------------------------------------------------------------|----------|------|-----|----|----|
| 488286085  | MULTISPECIES: ribosomal subunit interface protein [Bacilli]                        | 2.90E+08 | 6.20 | 36  | 3  | 3  |
| 488284982  | MULTISPECIES: 30S ribosomal protein S12 [Bacilli]                                  | 1.40E+09 | 5.00 | 116 | 2  | 2  |
| 401673922  | Translation initiation factor 3 [Enterococcus faecalis ATCC 29212]                 | 1.40E+07 | 2.73 | 14  | 4  | 4  |
| 259689662  | unnamed protein product [Enterococcus faecalis V583]                               | 1.40E+08 | 2.69 | 82  | 14 | 14 |
| 674289912  | 30S ribosomal protein S17 [Enterococcus faecalis ATCC 29212]                       | 5.10E+08 | 2.16 | 73  | 3  | 3  |
| 674290490  | ribonuclease R [Enterococcus faecalis ATCC 29212]                                  | 5.70E+07 | 1.54 | 62  | 14 | 14 |
| 674290096  | CRS1 / YhbY domain protein [Enterococcus faecalis ATCC 29212]                      | 5.10E+08 | 1.51 | 10  | 1  | 1  |
| 1145684417 | 30S ribosomal protein S14 2 [Enterococcus faecalis ATCC 29212]                     | 3.30E+07 | 1.51 | 7   | 1  | 1  |
| 1130374245 | glycosyl hydrolase family 25 [Enterococcus faecalis]                               | 2.30E+07 | 1.29 | 46  | 10 | 10 |
| 1145684462 | FMN-binding domain-containing protein [Enterococcus faecalis ATCC 29212]           | 5.60E+07 | 1.15 | 24  | 4  | 4  |
| 29374923   | (3R)-hydroxymyristoyl-ACP dehydratase [Enterococcus faecalis V583]                 | 1.20E+07 | 1.15 | 8   | 3  | 3  |
| 674290511  | ribosomal protein L28 [Enterococcus faecalis ATCC 29212]                           | 6.40E+08 | 1.15 | 18  | 2  | 2  |
| 29345119   | ribosomal protein L33 [Enterococcus faecalis V583]                                 | 2.10E+07 | 1.15 | 5   | 1  | 1  |
| 29374864   | 30S ribosomal protein S14 [Enterococcus faecalis V583]                             | 9.80E+06 | 1.15 | 2   | 1  | 1  |
| 1145680888 | acyl carrier protein [Enterococcus faecalis ATCC 29212]                            | 5.50E+06 | 1.15 | 5   | 1  | 1  |
| 401672587  | Polyribonucleotide nucleotidyltransferase [Enterococcus faecalis ATCC 29212]       | 2.00E+07 | 1.12 | 55  | 11 | 11 |
| 1130381733 | alpha-ketoacid dehydrogenase subunit beta [Enterococcus faecalis]                  | 1.20E+07 | 0.97 | 17  | 5  | 5  |
| 488284961  | MULTISPECIES: BMP family ABC transporter substrate-binding protein [Bacilli]       | 7.40E+06 | 0.91 | 19  | 6  | 5  |
| 1145683066 | 23S rRNA (uracil-5-)-methyltransferase Ruma [Enterococcus faecalis ATCC 29212]     | 1.20E+07 | 0.78 | 14  | 7  | 7  |
| 696539409  | MULTISPECIES: ribosome silencing factor RsfS [Bacilli]                             | 1.20E+08 | 0.78 | 7   | 1  | 1  |
| 1145681387 | hypothetical protein BWO99_13090 [Enterococcus faecalis ATCC 29212]                | 7.00E+07 | 0.73 | 20  | 4  | 4  |
| 488284915  | MULTISPECIES: serine--tRNA ligase [Bacilli]                                        | 1.90E+07 | 0.59 | 16  | 4  | 4  |
| 1145687141 | sugar ABC transporter substrate-binding protein [Enterococcus faecalis ATCC 29212] | 1.40E+07 | 0.51 | 14  | 5  | 5  |

|            |                                                                                                                                                        |          |      |    |   |   |
|------------|--------------------------------------------------------------------------------------------------------------------------------------------------------|----------|------|----|---|---|
| 1103215327 | dihydrolipoyllysine-residue<br>acetyltransferase<br>[Enterococcus faecalis]                                                                            | 3.50E+07 | 0.51 | 22 | 4 | 4 |
| 488284316  | MULTISPECIES: foldase<br>[Enterococcus]                                                                                                                | 2.40E+07 | 0.49 | 20 | 4 | 4 |
| 29342497   | Na <sup>+</sup> /H <sup>+</sup> antiporter<br>[Enterococcus faecalis<br>V583]                                                                          | 4.10E+05 | 0.47 | 3  | 2 | 2 |
| 488286231  | MULTISPECIES: LapA<br>family protein<br>[Enterococcus]                                                                                                 | 2.20E+06 | 0.47 | 2  | 1 | 1 |
| 508173288  | phosphoglycerate kinase<br>[Enterococcus faecalis<br>V583]                                                                                             | 3.80E+06 | 0.45 | 11 | 4 | 4 |
| 508210373  | pyruvate dehydrogenase<br>(acetyl-transferring) E1<br>component, alpha subunit<br>[Enterococcus faecalis<br>V583]                                      | 4.60E+06 | 0.44 | 12 | 3 | 3 |
| 1130377631 | hypothetical protein<br>[Enterococcus faecalis]                                                                                                        | 1.40E+07 | 0.36 | 13 | 2 | 2 |
| 488285554  | MULTISPECIES: ribosome-<br>recycling factor<br>[Enterococcus]                                                                                          | 6.10E+06 | 0.36 | 2  | 2 | 2 |
| 1145687331 | flavocytochrome c<br>[Enterococcus faecalis<br>ATCC 29212]                                                                                             | 3.50E+06 | 0.35 | 8  | 4 | 4 |
| 508175743  | M42 family peptidase<br>[Enterococcus faecalis<br>V583]                                                                                                | 7.40E+05 | 0.33 | 6  | 2 | 2 |
| 488286090  | MULTISPECIES:<br>phosphate ABC transporter<br>substrate-binding protein<br>PstS family protein<br>[Enterococcus]                                       | 1.60E+06 | 0.31 | 6  | 2 | 2 |
| 1145686991 | type I glyceraldehyde-3-<br>phosphate dehydrogenase<br>[Enterococcus faecalis<br>ATCC 29212]                                                           | 8.20E+05 | 0.29 | 3  | 2 | 2 |
| 488320734  | LytR family transcriptional<br>regulator [Enterococcus<br>faecalis]                                                                                    | 2.00E+06 | 0.27 | 5  | 2 | 2 |
| 29342304   | translation elongation factor<br>G [Enterococcus faecalis<br>V583]                                                                                     | 2.20E+06 | 0.27 | 11 | 3 | 3 |
| 488288051  | MULTISPECIES: ornithine<br>carbamoyltransferase<br>[Enterococcus]                                                                                      | 7.30E+06 | 0.26 | 4  | 2 | 2 |
| 674289671  | DNA-directed RNA<br>polymerase, alpha subunit<br>[Enterococcus faecalis<br>ATCC 29212]                                                                 | 5.80E+06 | 0.25 | 4  | 2 | 2 |
| 1130394976 | BMP family ABC<br>transporter substrate-<br>binding protein<br>[Enterococcus faecalis]                                                                 | 4.20E+06 | 0.23 | 10 | 2 | 1 |
| 33112267   | RecName: Full=Chaperone<br>protein DnaK; AltName:<br>Full=HSP70; AltName:<br>Full=Heat shock 70 kDa<br>protein; AltName: Full=Heat<br>shock protein 70 | 1.10E+06 | 0.21 | 4  | 3 | 3 |
| 508176118  | DNA-directed RNA<br>polymerase subunit beta'<br>[Enterococcus faecalis<br>V583]                                                                        | 1.70E+06 | 0.21 | 11 | 7 | 7 |
| 1130381827 | 23S rRNA<br>(guanosine(2251)-2'-O)-<br>methyltransferase RlmB<br>[Enterococcus faecalis]                                                               | 3.20E+06 | 0.19 | 5  | 1 | 1 |
| 29376483   | enolase [Enterococcus<br>faecalis V583]                                                                                                                | 1.20E+07 | 0.18 | 8  | 2 | 2 |
| 488283803  | MULTISPECIES: peptide<br>ABC transporter substrate-<br>binding protein [Bacilli]                                                                       | 8.90E+05 | 0.16 | 5  | 2 | 2 |

|            |                                                                                              |          |      |    |   |   |
|------------|----------------------------------------------------------------------------------------------|----------|------|----|---|---|
| 15625350   | GroEL [Enterococcus faecalis ATCC 29212]                                                     | 1.20E+06 | 0.15 | 4  | 2 | 2 |
| 29344963   | glutamyl-aminopeptidase [Enterococcus faecalis V583]                                         | 6.30E+06 | 0.14 | 10 | 1 | 1 |
| 29342814   | amino acid ABC transporter, amino acid-binding/permease protein [Enterococcus faecalis V583] | 5.70E+06 | 0.12 | 5  | 2 | 2 |
| 674289719  | iron-containing alcohol dehydrogenase family protein [Enterococcus faecalis ATCC 29212]      | 9.30E+06 | 0.12 | 5  | 1 | 1 |
| 674289455  | tyrosine-tRNA ligase [Enterococcus faecalis ATCC 29212]                                      | 9.10E+06 | 0.10 | 2  | 1 | 1 |
| 1130377498 | ATP-dependent helicase [Enterococcus faecalis]                                               | 1.20E+08 | 0.10 | 9  | 1 | 1 |
| 39931261   | RecName: Full=Translation initiation factor IF-2                                             | 3.00E+06 | 0.10 | 6  | 2 | 2 |
| 1103215315 | LysM peptidoglycan-binding domain-containing protein [Enterococcus faecalis]                 | 4.40E+06 | 0.07 | 5  | 1 | 1 |
| 488286321  | MULTISPECIES: formate acetyltransferase [Enterococcus]                                       | 5.90E+06 | 0.05 | 4  | 1 | 1 |

\* The area under the curve is the average area of the peptide peak intensities of the strongest three peptide signals of each protein (top 3 intensity area). For proteins that were identified with three or less peptides the average area was calculated based on all identified peptides. The top 3 intensity area can be used as a rough measure for the relative abundance of proteins in the sample.

\*\* The exponentially modified protein abundance index (emPAI) is calculated based on the number of peptide spectrum matches (PMSs) per protein normalized to the size of the protein. It can also be used as a rough measure for the relative abundance of proteins in the sample.

\*\*\* Only high confidence peptide identifications at a false discovery rate of  $q \leq 0.01$  have been considered. Proteins that were identified by at least 2 high confidence peptide hits were accepted as being identified. Since several ribosomal proteins are of low molecular weight and may yield only a low number of observable peptide species upon tryptic digestion, we also considered proteins that were identified by a single peptide only. However, the spectra of those single peptide hits were evaluated manually for a correct peak assignment.

**Table S2.** Chain IDs and residue ranges of the *E. faecalis* 70S ribosome modelled in the multi-body refined envelope.

|                     | Chain ID | No. residues | Modelled residues                                | Locus_tag     | Comments                 |
|---------------------|----------|--------------|--------------------------------------------------|---------------|--------------------------|
| <b>30S subunit</b>  |          |              |                                                  |               |                          |
| 16S rRNA            | a        | 1566         | 3-71; 97-1550                                    | OG1RF_RS11245 |                          |
| bS1                 | -        | 403          |                                                  | OG1RF_RS06555 | Not observed in EM maps. |
| uS2                 | -        | 261          |                                                  | OG1RF_RS09385 | Not observed in EM maps. |
| uS3                 | c        | 218          | 2-205                                            | OG1RF_RS00790 |                          |
| uS4                 | d        | 203          | 2-202                                            | OG1RF_RS11990 |                          |
| uS5                 | e        | 166          | 3-165                                            | OG1RF_RS00845 |                          |
| bS6                 | f        | 100          | 3-99                                             | OG1RF_RS00045 |                          |
| uS7                 | g        | 156          | 2-155                                            | OG1RF_RS00730 |                          |
| uS8                 | h        | 132          | 2-132                                            | OG1RF_RS00830 |                          |
| uS9                 | i        | 130          | 3-130                                            | OG1RF_RS12685 |                          |
| uS10                | j        | 102          | 4-102                                            | OG1RF_RS00755 |                          |
| uS11                | k        | 129          | 13-129                                           | OG1RF_RS00885 |                          |
| uS12                | l        | 137          | 2-137                                            | OG1RF_RS00725 |                          |
| uS13                | m        | 121          | 2-111                                            | OG1RF_RS00880 |                          |
| uS14                | n        | 61           | 2-61                                             | OG1RF_RS00825 |                          |
| uS15                | o        | 89           | 2-89                                             | OG1RF_RS11965 |                          |
| bS16                | p        | 91           | 2-90                                             | OG1RF_RS07250 |                          |
| uS17                | q        | 88           | 4-86                                             | OG1RF_RS00805 |                          |
| bS18                | r        | 79           | 13-78                                            | OG1RF_RS00055 |                          |
| uS19                | s        | 92           | 4-81                                             | OG1RF_RS00780 |                          |
| bS20                | t        | 83           | 2-83                                             | OG1RF_RS09590 |                          |
| bS21                | -        | 58           |                                                  | OG1RF_RS09460 | Not observed in EM maps. |
| tRNA (Class 1 only) | u        | 76           | 1-76                                             | OG1RF-RS01180 | tRNA-Phe                 |
| mRNA (Class 1 only) | v        | 5            | 15-19                                            |               |                          |
| <b>50S subunit</b>  |          |              |                                                  |               |                          |
| 23S rRNA            | A        | 2915         | 4-920, 943-1094, 1148-1579, 1583-2114, 2204-2911 | OG1RF_RS01070 |                          |
| 5S rRNA             | B        | 116          | 1-116                                            | OG1RF_RS01075 |                          |
| uL1                 | -        | 229          | -                                                | OG1RF_RS10650 | Not observed in EM maps. |
| uL2                 | C        | 276          | 2-276                                            | OG1RF_RS00775 |                          |
| uL3                 | D        | 209          | 2-208                                            | OG1RF_RS00760 |                          |
| uL4                 | E        | 207          | 2-207                                            | OG1RF_RS00765 |                          |
| uL5                 | F        | 179          | 2-178                                            | OG1RF_RS00820 |                          |
| uL6                 | G        | 178          | 2-177                                            | OG1RF_RS00835 |                          |
| uL9                 | -        | 150          |                                                  | OG1RF_RS00065 | Not observed in EM maps. |
| uL10                | -        | 166          |                                                  | OG1RF_RS10645 | Not observed in EM maps. |
| uL11                | -        | 140          |                                                  | OG1RF_RS10655 | Not observed in EM maps. |
| bL12                | -        | 122          |                                                  | OG1RF_RS10640 | Not observed in EM maps. |

|                                                |   |     |       |               |
|------------------------------------------------|---|-----|-------|---------------|
| uL13                                           | K | 147 | 1-145 | OG1RF_RS12690 |
| uL14                                           | L | 122 | 1-122 | OG1RF_RS00810 |
| uL15                                           | M | 146 | 1-146 | OG1RF_RS00855 |
| uL16                                           | N | 143 | 1-141 | OG1RF_RS00795 |
| bL17                                           | O | 127 | 3-126 | OG1RF_RS00895 |
| bL18                                           | P | 118 | 2-118 | OG1RF_RS00840 |
| bL19                                           | Q | 115 | 2-115 | OG1RF_RS08025 |
| bL20                                           | R | 119 | 2-119 | OG1RF_RS03345 |
| bL21                                           | S | 102 | 1-102 | OG1RF_RS03640 |
| uL22                                           | T | 115 | 4-115 | OG1RF_RS00785 |
| uL23                                           | U | 96  | 2-90  | OG1RF_RS00770 |
| uL24                                           | V | 103 | 1-101 | OG1RF_RS00815 |
| bL25 (not<br>modelled in<br>multi-body)        | W | 202 | 3-96  | OG1RF_RS02900 |
| bL27                                           | X | 95  | 18-93 | OG1RF_RS03650 |
| bL28                                           | Y | 62  | 2-55  | OG1RF_RS12195 |
| uL29                                           | Z | 62  | 2-62  | OG1RF_RS00800 |
| uL30                                           | 0 | 59  | 2-59  | OG1RF_RS00850 |
| bL31 type B<br>(not modelled<br>in multi-body) | 1 | 89  | 1-83  | OG1RF_RS04945 |
| bL32                                           | 2 | 59  | 2-57  | OG1RF_RS04035 |
| bL33                                           | 3 | 49  | 1-49  | OG1RF_RS11040 |
| bL34                                           | 4 | 44  | 1-44  | OG1RF_RS13195 |
| bL35                                           | 5 | 66  | 2-65  | OG1RF_RS03340 |
| bL36                                           | 6 | 38  | 1-38  | OG1RF_RS00875 |

**Table S3. Data collection, refinement and validation statistics for 70S structures.**

|                                                               | Multi-body                                    | Class 1       | Class 2       | Class 3       | Class 4       | Class 5       |
|---------------------------------------------------------------|-----------------------------------------------|---------------|---------------|---------------|---------------|---------------|
| Rotational state                                              |                                               | Chimeric      | Vacant 2      | Vacant 2      | Classical     | Vacant 3      |
| Image reconstruction                                          |                                               |               |               |               |               |               |
| Detector                                                      | Gatan K2                                      | Gatan K2      | Gatan K2      | Gatan K2      | Gatan K2      | Gatan K2      |
| Mode                                                          | Counting                                      | Counting      | Counting      | Counting      | Counting      | Counting      |
| Magnification                                                 | 22,500                                        | 22,500        | 22,500        | 22,500        | 22,500        | 22,500        |
| Number of micrographs                                         | 2,905                                         | 2,905         | 2,905         | 2,905         | 2,905         | 2,905         |
| Pixel Size (Å)                                                | 1.097                                         | 1.097         | 1.097         | 1.097         | 1.097         | 1.097         |
| Number of frames                                              | 25                                            | 25            | 25            | 25            | 25            | 25            |
| Total dose (e <sup>-</sup> Å <sup>-2</sup> )                  | 34                                            | 34            | 34            | 34            | 34            | 34            |
| Dose rate (e <sup>-</sup> Å <sup>-2</sup> sec <sup>-1</sup> ) | 6.8                                           | 6.8           | 6.8           | 6.8           | 6.8           | 6.8           |
| Exposure time (sec)                                           | 5                                             | 5             | 5             | 5             | 5             | 5             |
| Defocus range (µm)                                            | -0.41 to -3.6                                 | -0.41 to -3.6 | -0.41 to -3.6 | -0.41 to -3.6 | -0.41 to -3.6 | -0.41 to -3.6 |
| Particles extracted                                           |                                               |               | 335,676       |               |               |               |
| Particles used for reconstruction                             | 186,070                                       | 35,466        | 32,689        | 18,978        | 37,183        | 46,244        |
| FSC resolution (Å)*                                           | 50S: 2.8,<br>30S body:<br>3.0 30S<br>head 3.2 | 3.53          | 3.68          | 4.14          | 3.49          | 3.49          |
| B-factor sharpening (Å <sup>2</sup> ) †                       |                                               | -73.0         | -73.6         | -66.1         | -76.1         | -78.8         |
| <b>Atomic modelling</b>                                       |                                               |               |               |               |               |               |
| CC (model to map fit)                                         | 0.83                                          | 0.86          | 0.85          | 0.84          | 0.86          | 0.86          |
| B-factor average (rRNA)                                       | 18.3                                          | 141.0         | 170.1         | 191.8         | 143.3         | 140.0         |
| B-factor average (protein)                                    | 14.4                                          | 136.2         | 162.5         | 182.3         | 122.9         | 126.7         |
| <b>Model composition</b>                                      |                                               |               |               |               |               |               |
| Non-hydrogen atoms                                            | 133,554                                       | 140,020       | 138,301       | 138,301       | 138,498       | 138,498       |
| Residues: protein                                             | 5,058                                         | 5,211         | 5,212         | 5,212         | 5,235         | 5,235         |
| RNA                                                           | 4,378                                         | 4,623         | 4,542         | 4,542         | 4,542         | 4,542         |
| <b>Root mean square deviations</b>                            |                                               |               |               |               |               |               |
| Bond lengths (Å)                                              | 0.01                                          | 0.007         | 0.007         | 0.008         | 0.01          | 0.009         |
| Bond angles (°)                                               | 1.07                                          | 0.816         | 0.808         | 0.913         | 0.874         | 0.922         |
| Chirality (°)                                                 | 0.057                                         | 0.045         | 0.045         | 0.048         | 0.048         | 0.05          |
| Planarity (°)                                                 | 0.007                                         | 0.005         | 0.005         | 0.006         | 0.005         | 0.006         |
| <b>Validation</b>                                             |                                               |               |               |               |               |               |
| Clashscore                                                    | 6.42                                          | 19.15         | 20.95         | 40.67         | 16.93         | 20.01         |
| <i>Protein validation</i>                                     |                                               |               |               |               |               |               |
| Molprobity score                                              | 2.89                                          | 3.42          | 3.44          | 3.82          | 3.35          | 3.46          |
| Ramachandran favoured (%)                                     | 87.61                                         | 80.31         | 80.96         | 78.48         | 81.14         | 80.05         |
| Ramachandran allowed (%)                                      | 12.07                                         | 19.26         | 18.75         | 21.31         | 18.53         | 19.58         |
| Ramachandran outliers (%)                                     | 0.32                                          | 0.33          | 0.29          | 0.21          | 0.33          | 0.37          |
| Rotamer outliers (%)                                          | 16.52                                         | 15.60         | 15.19         | 19.31         | 15.40         | 16.74         |
| <i>RNA validation</i>                                         |                                               |               |               |               |               |               |
| Correct sugar puckers (%)                                     | 99.09                                         | 99.09         | 99.19         | 98.88         | 99.12         | 99.14         |
| Backbone angle outliers (%)                                   | 0.00022                                       | 0.00005       | 0.00002       | 0.00002       | 0.00004       | 0.00003       |
| PDB                                                           | 6W6P                                          | 6O8W          | 6O8X          | 6O8Y          | 6O8Z          | 6O90          |
| EMDB                                                          | EMD-21562                                     | EMD-0656      | EMD-0657      | EMD-0658      | EMD-0659      | EMD-0660      |

\* Fourier shell correlation reported by Relion 2.0 using the gold standard method at a correlation coefficient of 0.143. † The B-factor sharpening reported by Relion 2.0 during the post-refinement process.

**Table S4:** Regions with structural differences when comparing ribosomal RNA of *E. faecalis* (classical state; class 4) with *E. coli*. For each region, the residue range in *E. faecalis* and the corresponding range in *E. coli* is given.

| <i>E. faecalis</i> (class 4) |                              | <i>E. coli</i> vacant<br>PDB ID: 4YBB |
|------------------------------|------------------------------|---------------------------------------|
|                              | <i>E. faecalis</i> numbering | <i>E. coli</i> numbering              |
| 16S rRNA                     | 70-100                       | 75-95                                 |
|                              | 134-136                      | 129-130                               |
|                              | 182-213                      | 182-192                               |
|                              | 219-235                      | 198-220                               |
|                              | 468-495                      | 452-480                               |
|                              | 672-678                      | 658-663                               |
|                              | 850-867                      | 835-851                               |
|                              | 1015-1024                    | 999-1008                              |
|                              | 1037-1057                    | 1021-1041                             |
|                              | 1149-1156                    | 1134-1141                             |
|                              | 1455-1477                    | 1440-1460                             |
|                              | 1544-1550                    | 1528-1534                             |
| 5S rRNA                      | 12                           | 10                                    |
|                              | 32-36                        | 34-38                                 |
|                              | 77-95                        | 79-97                                 |
| 23S rRNA                     | 115-116                      | 117-120                               |
|                              | 135-146                      | 135-144                               |
|                              | 181-185                      | 180-182                               |
|                              | 230-235                      | 227-232                               |
|                              | 273-322                      | 270-285                               |
|                              | 390-410                      | 353-370                               |
|                              | 582-588                      | 543-551                               |
|                              | 647-657                      | 610-618                               |
|                              | 690-695                      | 651-655                               |
|                              | 916-943                      | 875-902                               |
|                              | 965-973                      | 924-932                               |
|                              | 1093-1145                    | 1053-1106                             |
|                              | 1209-1218                    | 1169-1180                             |
|                              | 1241-1249                    | 1202-1212                             |
|                              | 1309-1310                    | 1272-1274                             |
|                              | 1444-1466                    | 1409-1424                             |
|                              | 1624-1642                    | 1578-1599                             |
|                              | 1524-1554                    | 1481-1510                             |
|                              | 1574-1588                    | 1530-1542                             |
|                              | 1755-1760                    | 1712-1746                             |
|                              | 1869-1902                    | 1855-1887                             |
|                              | 2113-2204                    | 2099-2190                             |
|                              | 2331-2337                    | 2316-2323                             |
|                              | 2801-2822                    | 2786-2810                             |
|                              | 2895-2898                    | 2884-2888                             |
|                              | 2901-2911                    | 2890-2903                             |

**Table S5.** Structural differences between ribosomal proteins of *E. faecalis* (multi-body model), *S. aureus* (Sa), and *E. coli* (Ec). Number of residues for each ribosomal protein and structural differences are listed for each organism.

|                    | <i>E. faecalis</i>                              | <i>S. aureus</i> vacant<br>PDB ID: 5LI0                       | <i>E. coli</i> vacant<br>PDB ID: 4YBB                                                           |
|--------------------|-------------------------------------------------|---------------------------------------------------------------|-------------------------------------------------------------------------------------------------|
| <b>30S subunit</b> |                                                 |                                                               |                                                                                                 |
| bS1                | 403; not modelled                               | 391; not modelled                                             | 557; not modelled                                                                               |
| uS2                | 261; not modelled                               | 255                                                           | 241                                                                                             |
| uS3                | 218                                             | 217                                                           | 233                                                                                             |
| uS4                | 203; loop 17-44 differs in all three structures | 200                                                           | 206                                                                                             |
| uS5                | 166; N-terminal extension differs from Sa       | 166; N-terminal extension                                     | 167; C-terminal 159-164 different                                                               |
| bS6                | 100                                             | 98                                                            | 135; C-terminal 92-106 different, C-terminal 30 residues not modelled                           |
| uS7                | 156; loop 78-85 differs in all structures       | 156                                                           | 179                                                                                             |
| uS8                | 132                                             | 132                                                           | 130; loop 53-58 differs from others                                                             |
| uS9                | 130                                             | 132; C-terminus 118-132 differs from others                   | 130; loop 56-61 differs from others                                                             |
| uS10               | 102; loop 91-96 differs in all structures       | 102; aa 1-4 modelled,                                         | 103; loop 33-36 differs from others,                                                            |
| uS11               | 129                                             | 129; N-terminal 10-16 differs from others                     | 129                                                                                             |
| uS12               | 137; sequence insert 24-40 differs from Sa      | 136; sequence insert 24-40                                    | 124                                                                                             |
| uS13               | 121                                             | 121; C-terminal extension 115-120                             | 118; loop 39-48 differs from others                                                             |
| uS14               | 61                                              | 61                                                            | 101; inserted region 18-52                                                                      |
| uS15               | 89                                              | 89                                                            | 89; loop 16-24 differs from others                                                              |
| bS16               | 91; C-terminal additional helix 79-90           | 91; C-terminal additional helix 79-90                         | 82; loop 41-48 differs from others                                                              |
| uS17               | 88;                                             | 87; C-terminal extension 85-87                                | 84; N-terminus shorter and differs from others                                                  |
| bS18               | 79; N-terminal 13-24 differs from others        | 80;                                                           | 75; N-terminal 1-20 not modelled                                                                |
| uS19               | 92                                              | 92; loop 66-70 differs from others; C-terminal 81-87 modelled | 92                                                                                              |
| bS20               | 83; loop 42-45 differs in all structures        | 83                                                            | 87; N-terminal 3-4 differs from others; C-terminal extension 84-87                              |
| bS21               | 58; not modelled                                | 58                                                            | 71; not modelled                                                                                |
| <b>50S subunit</b> |                                                 |                                                               |                                                                                                 |
| uL1                | 229; not modelled                               | 230; not modelled                                             | 234                                                                                             |
| uL2                | 276                                             | 277                                                           | 273; loop 20-30 differs from others, strand extension 165-168, loop 239-246 differs from others |

|         |                                                                                                                                                                                    |                                                                                                                                                                                |                                                                            |
|---------|------------------------------------------------------------------------------------------------------------------------------------------------------------------------------------|--------------------------------------------------------------------------------------------------------------------------------------------------------------------------------|----------------------------------------------------------------------------|
| uL3     | 209; loop 30-34 different in all structures; loop 84-93 different in all structures; loop 103-107 different in all structures;                                                     | 220; insertion 58-68 differs from others; C-terminal 217-219 extension                                                                                                         | 209                                                                        |
| uL4     | 207; insert 8-14; loop 128-133 different in all structures, loop 156-161 different in all structures                                                                               | 207; insert 8-14                                                                                                                                                               | 201; loop 49-56 differs from others; loop 57-73 shifted relative to others |
| uL5     | 179; strand 72-75 differs from others;                                                                                                                                             | 179; helix 5-17 shifted relative to others; loop 21-31 differs from others; loop 40-44 differs from others, region 68-80 differs from others; loop 125-144 differs from others | 179                                                                        |
| uL6     | 178; loop 36-41 and loop 53-68 differ in all structures                                                                                                                            | 178                                                                                                                                                                            | 177                                                                        |
| bL7/L12 | 122; not modelled                                                                                                                                                                  | 122; not modelled                                                                                                                                                              | 121; not modelled                                                          |
| uL9     | 150; not modelled                                                                                                                                                                  | 148; not modelled                                                                                                                                                              | 149; involved in crystal contacts                                          |
| uL10    | 166; not modelled                                                                                                                                                                  | 166; not modelled                                                                                                                                                              | 165                                                                        |
| uL11    | 140; not modelled                                                                                                                                                                  | 140; not modelled                                                                                                                                                              | 142                                                                        |
| uL13    | 147                                                                                                                                                                                | 145                                                                                                                                                                            | 142                                                                        |
| uL14    | 122                                                                                                                                                                                | 122                                                                                                                                                                            | 123; loop 87-94 differs from others                                        |
| uL15    | 146; C-terminal domain shifted                                                                                                                                                     | 146; significant differences to other structures                                                                                                                               | 144; secondary structure elements in C-terminal domain shifted             |
| uL16    | 143; N-terminal extension 1-4, C-terminal extension 137-141 differs from others                                                                                                    | 144; N-terminal and C-terminal extension                                                                                                                                       | 136                                                                        |
| bL17    | 127; inserted loop 68-84 differs from Sa                                                                                                                                           | 122; inserted loop 67-80                                                                                                                                                       | 127; C-terminal extension 117-125                                          |
| bL18    | 118; N-terminal extension 2-5 differs from Sa; region 22-29 differs in all structures, loop 46-51 differs in all structures, loop 58-68 significantly different in all structures, | 119; N-terminal extension;                                                                                                                                                     | 117                                                                        |
| bL19    | 115; C-terminal 111-115 modelled,                                                                                                                                                  | 116                                                                                                                                                                            | 115; C-terminal 111-115 modelled                                           |
| bL20    | 119                                                                                                                                                                                | 118                                                                                                                                                                            | 118                                                                        |
| bL21    | 102                                                                                                                                                                                | 102                                                                                                                                                                            | 103                                                                        |
| uL22    | 115; N-terminal 4-6 modelled                                                                                                                                                       | 117                                                                                                                                                                            | 110                                                                        |
| uL23    | 96; loop 63-69 differs in all structures, C-terminal extension 87-90                                                                                                               | 91; C-terminal extension 87-90                                                                                                                                                 | 100; N-terminal extension 1-5                                              |
| uL24    | 103; loop 1-7 and loop 45-55 different in all structures, loop 71-78 differs from others                                                                                           | 105                                                                                                                                                                            | 104                                                                        |
| bL25    | 202; not modelled in multi-body; Class 4: loop 33-36 and region 54-71 different in all structures                                                                                  | 217                                                                                                                                                                            | 94; region 10-25 shifted, helix 45-53 shifted,                             |
| bL27    | 95; loop 81-85 different in all structures                                                                                                                                         | 94; N-terminal region 12-26 differs from others                                                                                                                                | 85; strand 36-40 shifted                                                   |
| bL28    | 62; loop 38-46 different in all structures,                                                                                                                                        | 62; region 10-29 different from others                                                                                                                                         | 78; long C-terminal extension 57-78                                        |
| uL29    | 62                                                                                                                                                                                 | 69; C-terminal extension 63-66                                                                                                                                                 | 63                                                                         |
| uL30    | 59                                                                                                                                                                                 | 59                                                                                                                                                                             | 59                                                                         |
| bL31    | 89; not modelled in multi-body;                                                                                                                                                    | 84                                                                                                                                                                             | 70; type A; not modelled                                                   |
| type B  | Class 4: modelled differently from Sa                                                                                                                                              |                                                                                                                                                                                |                                                                            |

|      |                                           |                                                                                            |                                         |
|------|-------------------------------------------|--------------------------------------------------------------------------------------------|-----------------------------------------|
| bL32 | 59; smaller shifts between all structures | 58                                                                                         | 57                                      |
| bL33 | 49; Zn-bound conformation modelled        | 49; loop 32-41 differs from others; Zn-binding site not conserved in Sa                    | 55; Zn-binding site not conserved in Ec |
| bL34 | 44                                        | 45                                                                                         | 46; C-terminal extension 44-46          |
| bL35 | 66                                        | 66; loop 2-9 shifted; loop 15-20 and region 23-41 differ from others; region 44-61 shifted | 65                                      |
| bL36 | 38                                        | 37                                                                                         | 38                                      |

**Table S6.** 30S body and head rotations in *E. faecalis* 70S ribosome structures relative to an *E. coli* reference in the classical state (PDB ID 4V51).

| Class | 30S body rotation (°) | 30S head rotation (°) | tRNA |
|-------|-----------------------|-----------------------|------|
| 1     | 2.0                   | 19.7                  | pe/E |
| 2     | 4.5                   | 17.1                  | -    |
| 3     | 3.9                   | 16.6                  | -    |
| 4     | 3.3                   | 2.6                   | -    |
| 5     | 1.8                   | 14.5                  | -    |

## Supplementary References

- 1 Wisniewski, J. R., Zougman, A., Nagaraj, N. & Mann, M. Universal sample preparation method for proteome analysis. *Nat Methods* **6**, 359-362, doi:10.1038/nmeth.1322 (2009).
- 2 Borovinskaya, M. A. *et al.* Structural basis for aminoglycoside inhibition of bacterial ribosome recycling. *Nat. Struct. Mol. Biol.* **14**, 727-732, doi:10.1038/nsmb1271 (2007).
- 3 Noeske, J. *et al.* Synergy of streptogramin antibiotics occurs independently of their effects on translation. *Antimicrob. Agents Chemother.* **58**, 5269-5279, doi:10.1128/AAC.03389-14 (2014).
- 4 Eyal, Z. *et al.* Structural insights into species-specific features of the ribosome from the pathogen *Staphylococcus aureus*. *Proc. Natl. Acad. Sci. USA* **112**, E5805-5814, doi:10.1073/pnas.1517952112 (2015).
- 5 Jenner, L. *et al.* Structural basis for potent inhibitory activity of the antibiotic tigecycline during protein synthesis. *Proc. Natl. Acad. Sci. USA* **110**, 3812-3816, doi:10.1073/pnas.1216691110 (2013).
